# Supplementary material
Source: Springer Nature journal article supplement (https://www.springermedizin.de/resource/supplementary/12906_2011_478_MOESM6_ESM.pdf/9519612)

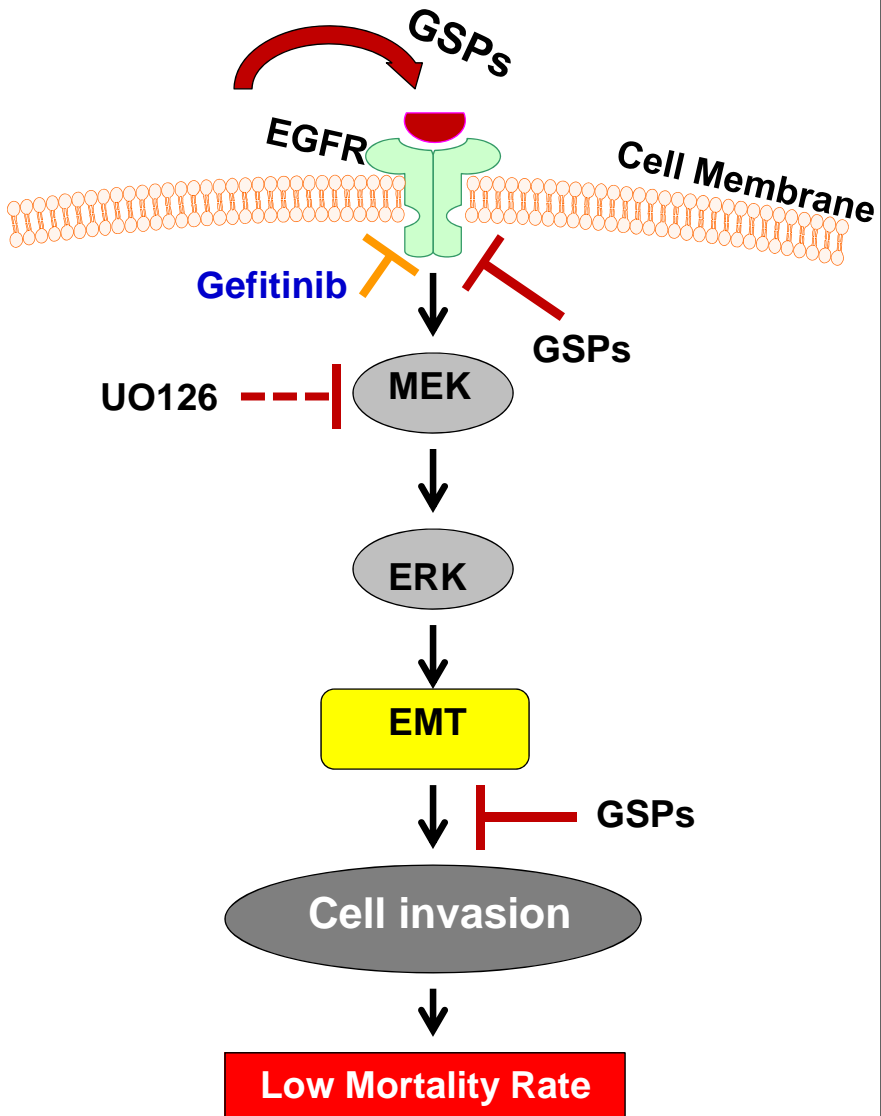

Supplement: MOESM6 [file 9519612]
